# Supplementary material for: Purple corn extract induces long-lasting reprogramming and M2 phenotypic switch of adipose tissue macrophages in obese mice
Source: PubMed Central journal article supplement (PMC6651915; doi:10.1186/s12967-019-1972-6), 2019-07-23
Supplement: 12967_2019_1972_MOESM1_ESM.pdf [file 12967_2019_1972_MOESM1_ESM.pdf]

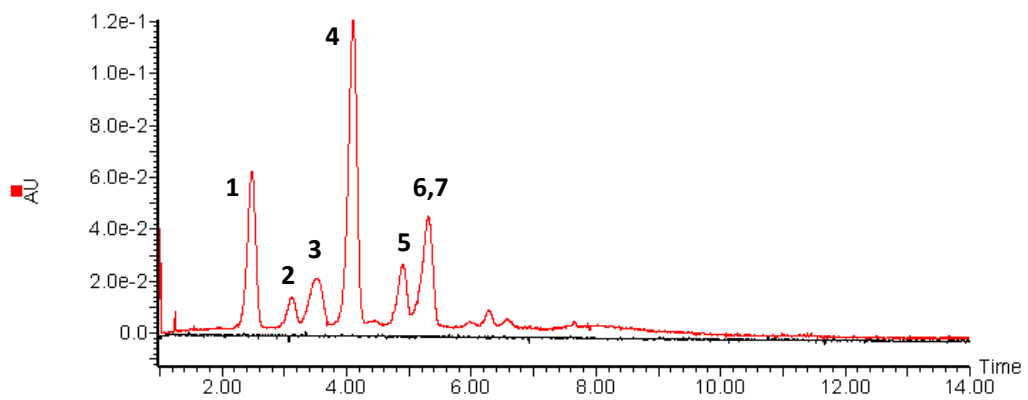

**Figure S1**

A.

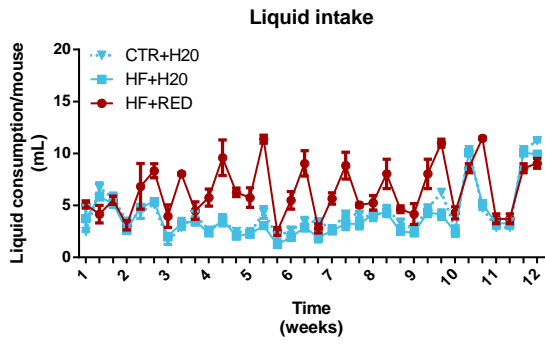

B.

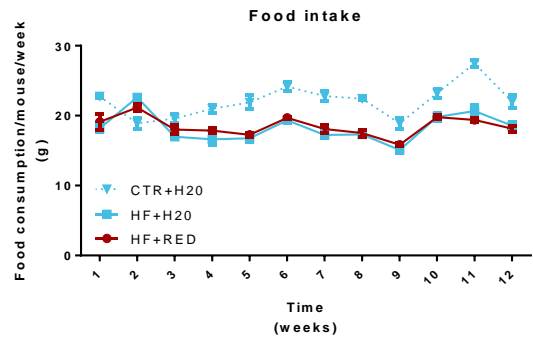

**Figure S2**

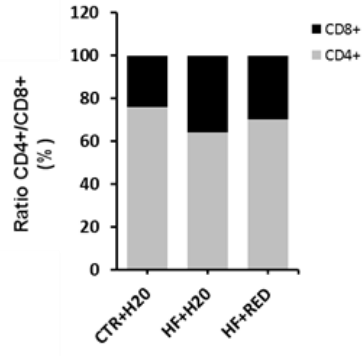

**Figure S3**

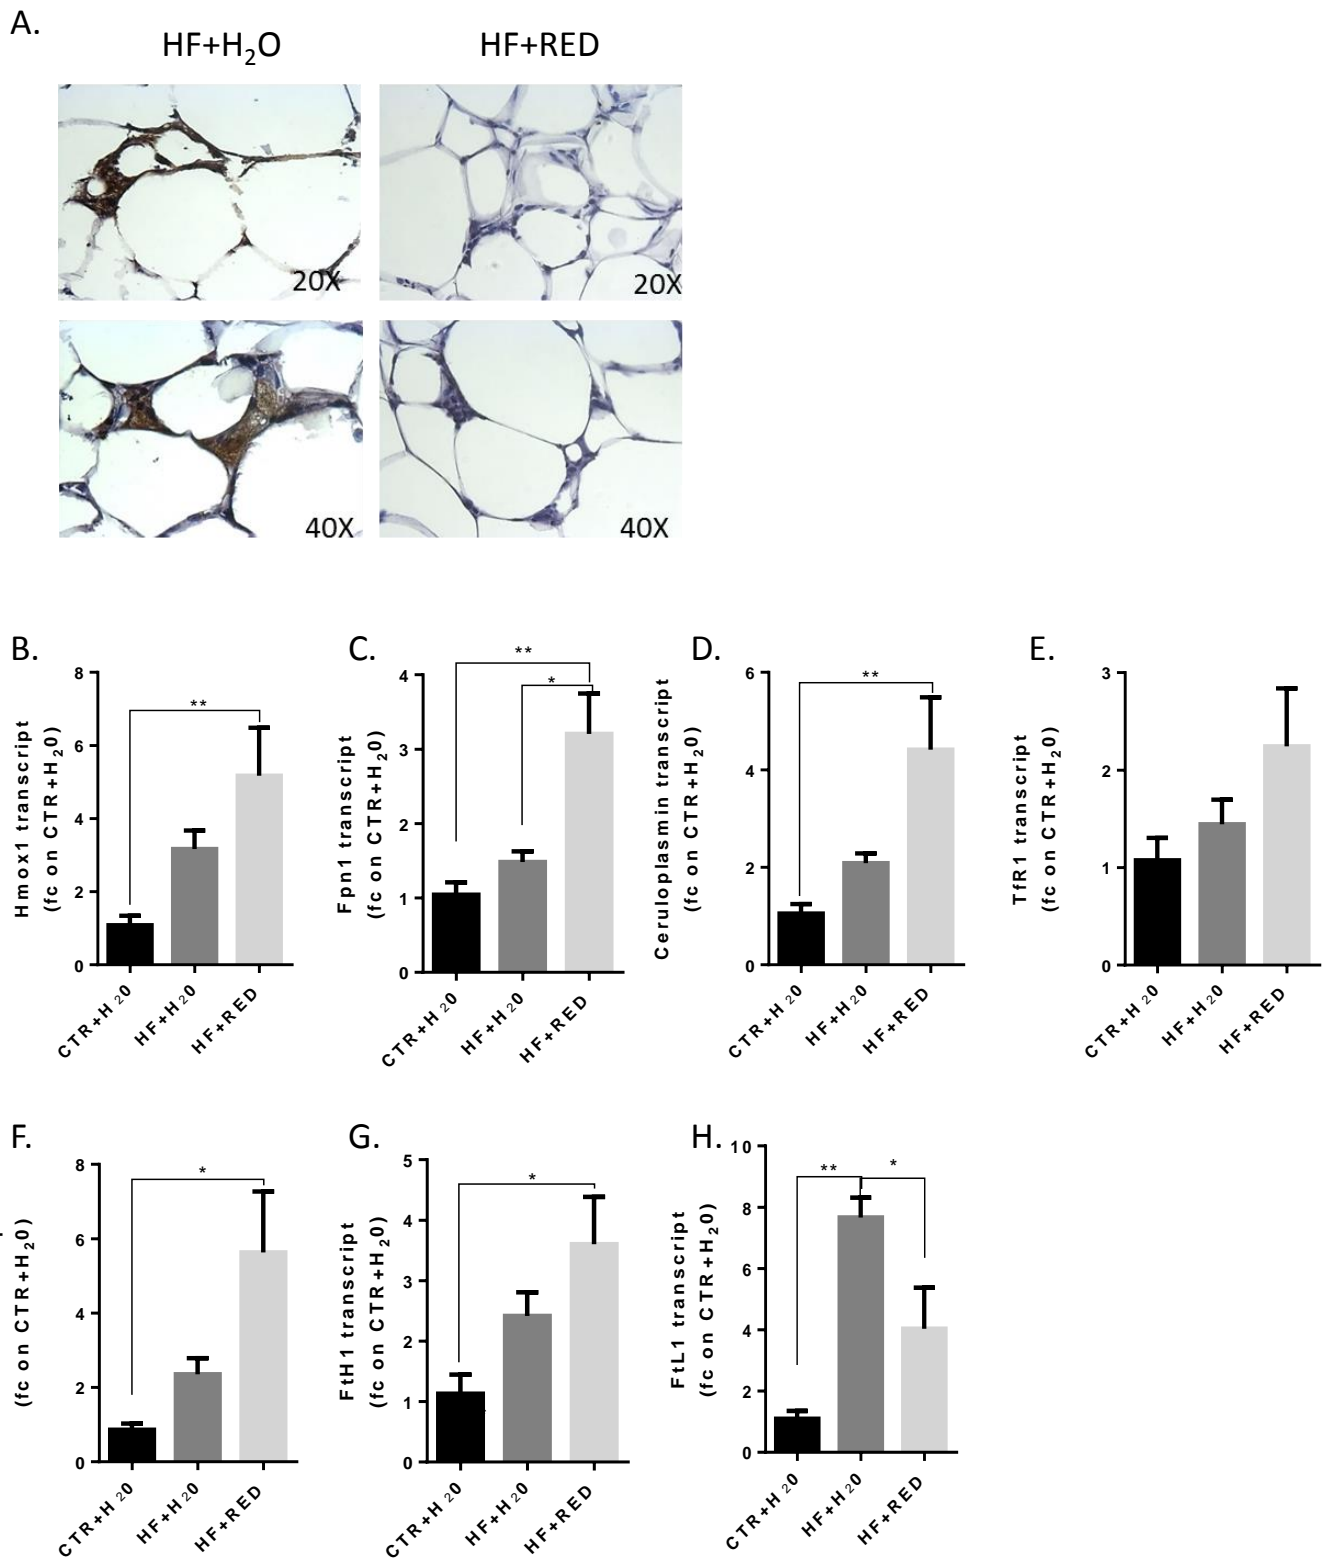

**Figure S4**

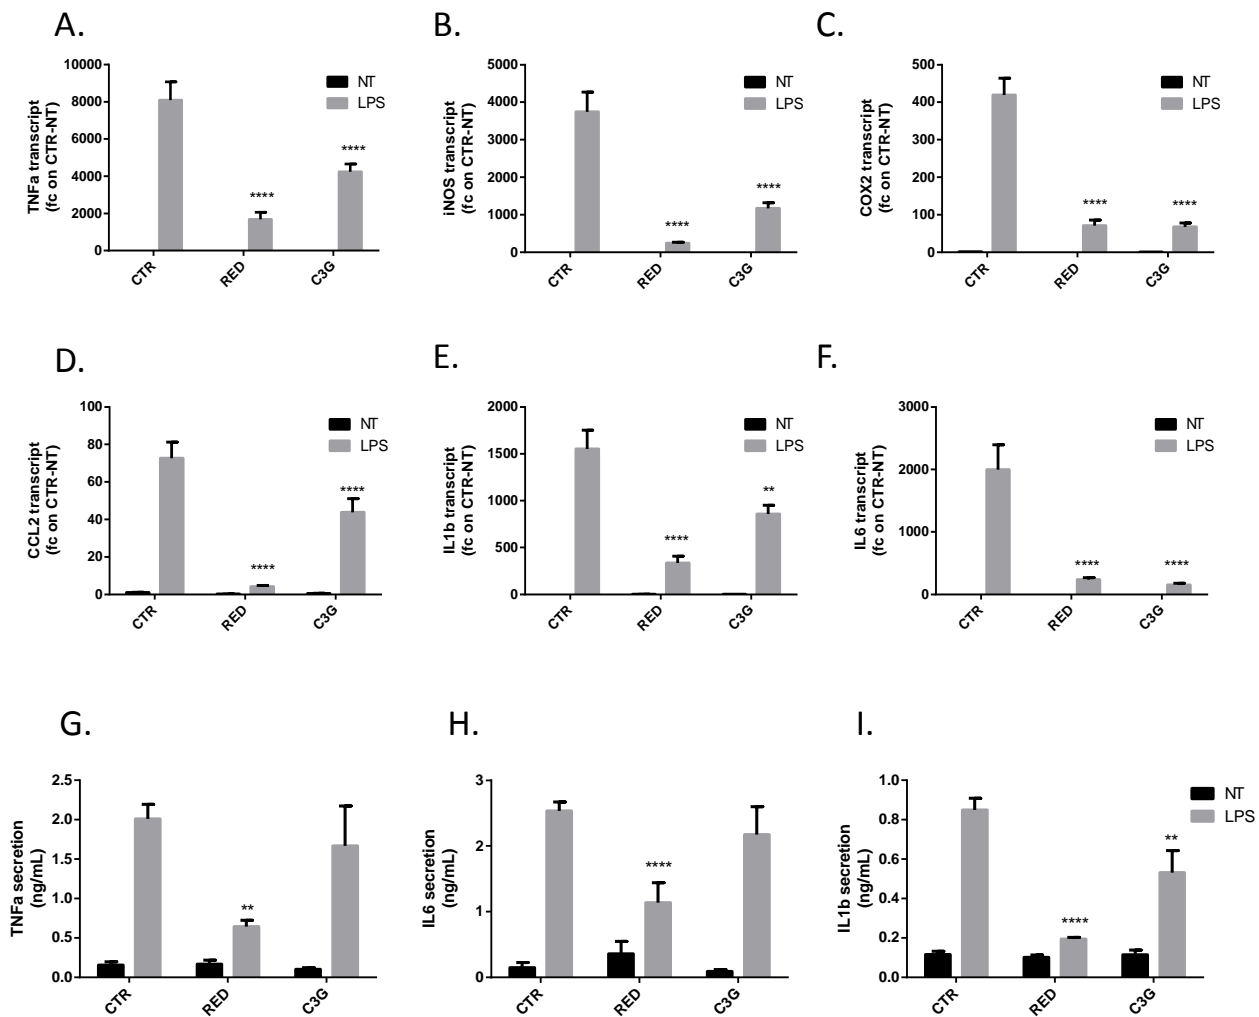

**Figure S5**
