# Supplementary material for: Archive Survival Guide: Practical and Theoretical Approaches for the Next Century of Women's Studies Research. (Conversations)
Source: Springer Nature journal article supplement (doi:10.1186/s12967-019-1972-6), 2002-06-01
Supplement: MOESM2 [file 16973862]

**Table S1:** Tentative annotation of the major anthocyanins detected in the purple corn cob powder<sup>1</sup>

| Compound | R <sub>t</sub> | UV/Vis           |                                | LC-ESI MS                 | LC-ESI MS fragments <sup>2</sup> | Structure |
|----------|----------------|------------------|--------------------------------|---------------------------|----------------------------------|-----------|
|          |                | $\lambda_{\max}$ |                                |                           |                                  |           |
|          | <i>min</i>     | <i>nm</i>        | <i>(m/z) [M+H<sup>+</sup>]</i> |                           |                                  |           |
| 1        | 2.48           | 281/515          | 449.10                         | 287.13 (Cy) <sup>+</sup>  | Cyanidin-glucoside               |           |
| 2        | 3.12           | 280/510          | 433.11                         | 271.06 (Pg) <sup>+</sup>  | Pelargonidin-glucoside           |           |
| 3        | 3.53           | 280/515          | 463.12                         | 301.07 (Peo) <sup>+</sup> | Peonidin-glucoside               |           |
| 4        | 4.10           | 281/520          | 535.10                         | 287.13 (Cy) <sup>+</sup>  | Cyanidin-malonylglucoside        |           |
| 5        | 4.90           | 280/506          | 519,11                         | 271.06 (Pg) <sup>+</sup>  | Pelargonidin-malonylglucoside    |           |
| 6        | 5.27           | 281/519          | 549.12                         | 301.07 (Peo) <sup>+</sup> | Peonidin-malonylglucoside        |           |
| 7        | 5.32           | 281/519          | 621.10                         | 287.05 (Cy) <sup>+</sup>  | Cyanidin-dimalonylglucoside      |           |

<sup>1</sup>Peaks 1 to 7 (as indicated in Figure S1) were identified based on photo diode array absorbance and mass fragmentation patterns. The purified substances were analysed by HPLC and ESI-MS. Spectral characteristics, molecular ions and fragments of the different compounds are presented.

<sup>2</sup>Fragments: Cyanidin (Cy); Peonidin (Peo); Pelargonidin (Pg).

| Gene        | Primer sequence                   | Gene         | Primer sequence                    |
|-------------|-----------------------------------|--------------|------------------------------------|
| Adiponectin | 5'-GCACTGGCAAGTTCTACTGCAA-3' for  | CCL2         | 5'-AGGTCTTCAGCACCTTTGAAT-3' for    |
|             | 5'-GTAGGTGAAGAGAACGGCCTTGT-3' rev |              | 5'-TCACACTGGTCACTCCTACA-3' rev     |
| Leptin      | 5'-CCTGTGGCTTTGGTCCTATC-3' for    | F4/80        | 5'-CGTCAGGTACGGGATGAATATAAG-3' for |
|             | 5'-GATCTGGTGACAATGGTCTT-3' rev    |              | 5'-ATCTTGGAAAGTGGATGGCATAG-3' rev  |
| Perilipin   | 5'-GGTGTACGGATAACGTGGTAG-3' for   | TNF $\alpha$ | 5'-GAAAAGCAAGCAGCCAACCA-3' for     |
|             | 5'-GATGTCTCGGAATTCGCTCTC-3' rev   |              | 5'-CGGATCATGCTTTCTGTGCTC-3' rev    |
| Resistin    | 5'-AGAAGGCACAGCAGTCTTG-3' for     | Hmox1        | 5'-GTCCTGAAGAAGATTGCACAGA-3' rev   |
|             | 5'-GTCCAGTCTATCCTTGCACAC-3' rev   |              | 5'-GTCGATGTTCCGGGAAGGTAAA-3' rev   |
| Rbp4        | 5'-AGACAGTACTCCTTTGTGTTT-3' for   | Fpn1         | 5'-CGGTCTTTGGTCCTTTGATTTG-3' for   |
|             | 5'-CAATCCATCTGTAAGTGCCTCTC-3' rev |              | 5'-GCAGAAGGTCAAGAAGGTAGTT-3' rev   |
| TGF $\beta$ | 5'-AGAGCGTCTATCACCCATCT-3' for    | CD163        | 5'-AGTCATCTGCACTGGGAAAG-3' for     |
|             | 5'-CTCATCCACCACCATGTCTTC-3' rev   |              | 5'-GACATGAACTCGGAGCAGATAA-3' rev   |
| Arg1        | 5'-AGCAGAGGAGGTGAAGAGTA-3' for    | TfR1         | 5'-TCCTGTGCCCCTATGTATCT-3' for     |
|             | 5'-GTAGTCAGTCCCTGGCTTATG-3' rev   |              | 5'-CGAAGCTTCAAGTTCTCCACTA-3' rev   |
| IL10        | 5'-GAGGCGCTGTCATCGATTT-3' for     | Cerulopl.    | 5'-AGAGAGACTGCAAACCTATTC-3' for    |
|             | 5'-CACCTTGGTCTTGGAGCTTATT-3' rev  |              | 5'-CCTGTGTAGTGATCCGTTGTAAG-3' rev  |
| Cox2        | 5'-CATCCCAGGCCGACTAAAT-3' for     | FtL1         | 5'-GCCATGGAGAAGAACCTGAA-3' for     |
|             | 5'-TGGGCATAAAGCTATGGTTAGA-3' rev  |              | 5'-TTTCCAGGAAGTCACAGAGATG-3' rev   |
| IL6         | 5'-CCAGAGTCCTTCAGAGAGATACA-3' for | FtH1         | 5'-ACTGCACAAACTGGCTACTG-3' for     |
|             | 5'-CCTTCTGTGACTCCAGCTTATC-3' rev  |              | 5'-CGTGGTCACCCAGTTCTTTAAT-3' rev   |
| IL1b        | 5'-GGTGTGTGACGTTCCCATTA-3' for    | Fizz1        | 5'-TGCCAATCCAGCTAACTATCC-3' for    |
|             | 5'-ATTGAGGTGGAGAGCTTTCAG-3' rev   |              | 5'-CACACCCAGTAGCAGTCATC-3' rev     |

**Table S2.** Primer sequences utilized for qPCR evaluation of gene expression.

**Table S3.** Body weight gain, energy intake and feed efficiency<sup>1</sup>

|                              | CTR+H <sub>2</sub> O | HF+H <sub>2</sub> O | HF+RED       |
|------------------------------|----------------------|---------------------|--------------|
| Body weight gain (g)         | 13.7±0.5             | 23.2±0.7****        | 25.3±1.1**** |
| Energy intake (kcal/week)    | 85.0±1.4             | 86.4±1.5            | 87.4±1.1     |
| Feed efficiency <sup>2</sup> | 1.3±0.1              | 2.2±0.1****         | 2.4±0.2****  |

<sup>1</sup>Values are mean ± SEM. <sup>2</sup>Body weight gain (g) / kcal consumed. \*\*\*\*p<0.0001 vs CTR+H<sub>2</sub>O.

**Table S4.** Non-esterified fatty acids (NEFA) in plasma of mice under dietary treatments

|                      | Miristic (C14) | Palmitoleic (C16:1) | Palmitic (C16:0) | Linoleic (C18:2) | Oleic (C18:1) | Vaccenic (C18:1) | Stearic (C18:0) | Total NEFA   |
|----------------------|----------------|---------------------|------------------|------------------|---------------|------------------|-----------------|--------------|
| CTR+H <sub>2</sub> O | 4.73±1.26      | 39.46±12.34         | 33.04±7.29       | 18.10±2.59       | 44.03±8.04    | 10.41±3.00       | 13.68±3.53      | 163.46±38.05 |
| HF+H <sub>2</sub> O  | 5.45±0.28      | 3.41±0.22*          | 59.03±6.64       | 42.71±6.40       | 86.94±21.69** | 10.42±0.80       | 42.84±8.07      | 250.80±39.20 |
| HF+RED               | 3.78±0.66      | 2.67±0.47*          | 41.32±4.18       | 32.43±4.67       | 72.39±11.30   | 8.27±1.44        | 29.72±6.09      | 190.59±26.58 |

Concentrations are expressed as ng/mL. Results are expressed as mean ±SEM (n=5-6). \*, p<0.05, \*\*, p<0.01 vs CTR+H<sub>2</sub>O.
